# Supplementary material
Source: PubMed Central journal article supplement (PMC5060699)
Supplement: HEX-17-036-s001.pdf [file HEX-17-036-s001.pdf]

## Online Appendix.

**Description of data:** This file includes the SIMS-Trial group investigators

### Appendix: SIMS-Trial group investigators

**Trial steering committee:** R D'Alessandro (*Chair*), Department of Clinical Neurology, University of Bologna, Bologna; A Solari, Unit of Neuroepidemiology, Foundation IRCCS Neurological Institute C. Besta, Milan; E Pucci, Neurology Department, Macerata Hospital, Macerata; V Martinelli, Department of Neurology, Scientific Institute Hospital San Raffaele, Milan; M Messmer Uccelli, Department of Health Services and Research, Italian MS Society, Genoa; C Borreani, Psychology Unit, National Cancer Institute Foundation, Milan; M Trojano, Departments of Neurological and Psychiatric Sciences, University of Bari, Bari; all in Italy.

**Independent data and safety monitoring committee:** C Heesen (*Chair*), Institute of Neuroimmunology and Clinical MS Research, University Medical Center Hamburg-Eppendorf, Hamburg, Germany; GL Mancardi, Departments of Neurology, Ophthalmology and Genetics, University of Genoa, Genoa, Italy; C Milanese, Multiple Sclerosis Unit, Foundation IRCCS Neurological Institute C. Besta, Milan, Italy; S Galimberti, Department of Clinical Medicine Prevention and Biotechnology, University of Milan-Bicocca, Italy.

**Data management and analysis committee:** A Solari, A Giordano, D Calabrese, G Ferrari, Unit of Neuroepidemiology, Foundation IRCCS Neurological Institute C. Besta, Milan, Italy.

**Intervention panel:** C Borreani, Psychology Unit, National Cancer Institute Foundation, Milan; K Mattarozzi, Department of Psychology, University of Bologna, Bologna; M Messmer Uccelli, Department of Health Services and Research, Italian MS Society, Genoa; A Giordano, Unit of Neuroepidemiology, Foundation IRCCS Neurological Institute C. Besta, Milan; all in Italy.

**Randomization unit:** A Solari, G Ferrari, A Giordano, B Reani, Unit of Neuroepidemiology, Foundation IRCCS Neurological Institute C. Besta, Milan, Italy.

**Participating centers:** Department of Neuromuscular Diseases, Foundation IRCCS Neurological Institute C. Besta, Milan: P Confalonieri, C Antozzi, L Maggi, R Mantegazza; Department of Neurology, Scientific Institute Hospital San Raffaele, Milan: V Martinelli, B Colombo, F Esposito, L Moiola, M Rodegher, M Radaelli; Department of Neurosciences, Neurology Unit, University of Parma, Parma: F Granella, P Immovilli, E Dalla Bella; Department of Neuroscience and Imaging, University G. d'Annunzio of Chieti-Pescara: A Lugaresi, D Farina, G De Luca, V Di Tommaso, M Di Ioia, D Travaglini, E Pietrolongo; Department of Neurological and Psychiatric Sciences, University of Bari, Bari: M Trojano, G Zimatore, I Plasmati, C Tortorella; all in Italy.
