# Supplementary material
Source: PubMed Central journal article supplement (PMC5060699)
Supplement: HEX-17-036-s003.pdf [file HEX-17-036-s003.pdf]

**Table S2.** Template for FGM with SIMS-Trial interviewing physicians.

**Description of data:** Template for FGM with SIMS-Trial interviewing physicians.

Probes are reported in italics. FGM, Focus Group Meeting.

1. Can you describe the main interactions occurring during the personal interview?  
*(Who did or said what, what happened in succession during the time that was available?)*
2. Which arguments, in terms of contents, did the patient prefer during CD navigation and during the personal interview?  
*(Which information attracted more attention? What seemed to be more important in using the time on hand?...)*
3. Did you experience positively this way of interacting with the patient or there were shortcomings?  
*(How did you feel during the personal interview? at ease, uncomfortable?... Was the personal interview an useful means?)*
4. Which aspects of the personal interview left a more positive impression on you?  
*(Are there elements such as contents, setting or method that you might think of expanding if you should use this tool in the future?...)*
5. Which aspects of the interview left a more negative impression on you?  
*(Are there elements such as contents, setting or method that you might think of changing or eliminating if you should use this tool in the future?...)*
6. What are the strong and the weak points of this approach, which includes the physician's presence, informative material navigation on a CD and booklet presentation, according to your direct experience during the trial?  
*(Are there single components of the CD that you deem positive or negative? Are there any procedural issues that you evaluate positively or negatively?...)*
7. After your own direct experience, do you think the physician's role in the interview is necessary, or that other professionals could be involved?  
*(Do you think that the choice of a doctor is the best choice in terms of cost/benefits? Do you think that other professionals could be included? If so, specify: Psychologists, other patients in a "peer" role, nurses?...)*
8. With improvement as the objective, would you have any suggestions to offer for increasing the informative system's efficacy for your patients, if it should be used in the future?  
*(The question can refer to organization, contents, or informative support quality, etc...).*
