# Supplementary material
Source: PubMed Central journal article supplement (PMC5060699)
Supplement: HEX-17-036-s004.pdf [file HEX-17-036-s004.pdf]

**Table S3.** Template for FGM with SIMS-Trial caring neurologists.

**Description of data:** Template for FGM with SIMS-Trial caring neurologists.

Probes are reported in Italics. FGM, Focus Group Meeting. MS, Multiple Sclerosis.

1. Please describe the general impression you have as a caring neurologist regarding your patients' participation in the SIMS-Trial.  
*(What emerged during the consultations? Did you perceive any difference between the group who received the information aid, the control group, and the newly diagnosed patients in every-day practice?)*
2. The trial made use of different elements within the information aid: the physician, a navigable CD, and a booklet. Which of these components do you consider more useful and which do you consider less useful?  
*(In terms of cost/benefits? Considering the effects on the doctor-patient relationship?)*
3. As a caring neurologist can you report any positive elements as a consequence of patient's receipt of the aid?  
*(Did the patients describe situations or contents that they evaluated as positive? Were there aspects that were particularly appreciated?...)*
4. As a caring neurologist can you report any negative elements as a consequence of patient's receipt of the aid?  
*(Did the patients describe situations or contents that they evaluated as negative? Were there aspects that were not particularly appreciated?...)*
5. You have seen the CD and booklet. How do you evaluate its contents and layout?  
*(Did you navigate with the disc? What is your impression? What do you think about the booklet as an information resource?...)*
1. As a caring neurologist, have you observed trial effects on the patient's knowledge of MS?  
*(Do you think those of your patients receiving the aid showed observable differences regarding their knowledge of MS? Have you noticed differences with the control group or newly diagnosed patients in every-day practice?...)*
7. As a caring neurologist, have you observed trial effects on patient's satisfaction with care and on the patient-physician communication?  
*(Do you think the patients receiving the aid showed observable differences in their relationship with the caring neurologist? Have you noticed differences with the control group or newly diagnosed patients in every-day practice?...)*
8. With improvement as the objective, would you have any suggestions to offer for increasing the informative system's efficacy for your patients, if it should be used in the future?  
*(The question refers to organization, contents, or informative support quality, etc...).*
